# Supplementary material
Source: Springer Nature journal article supplement (https://www.springermedizin.de/resource/supplementary/13075_2010_2856_MOESM1_ESM.pdf/9693042)

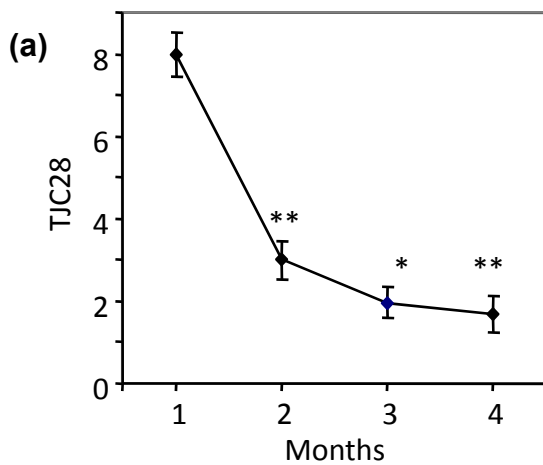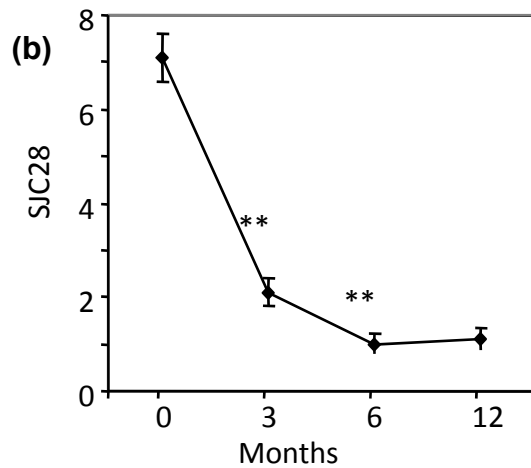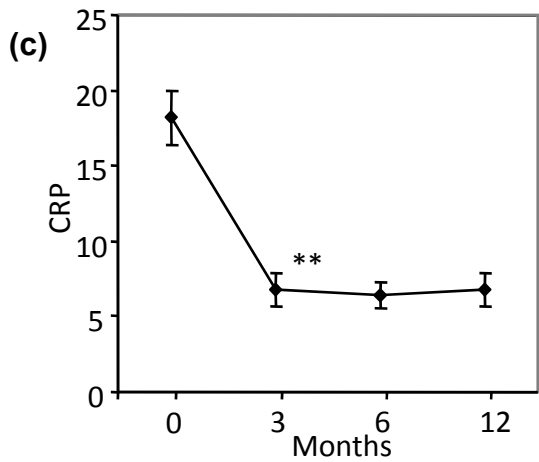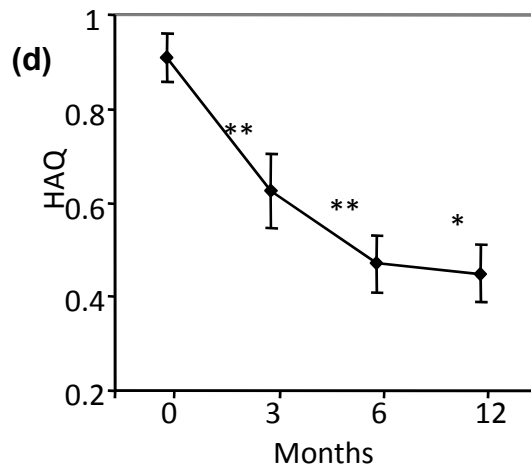

Supplement: MOESM1 [file 9693042]
